## CORRECTION

# Correction: Can self-efficacy mediate between knowledge of policy, school support and teacher attitudes towards inclusive education?

Shirli Werner, Thomas P. Gumpel, Judah Koller, Vered Wiesenthal, Naomi Weintraub

The second author's name is spelled incorrectly. The correct name is: Thomas P. Gumpel.

## Reference

1. Werner S, Gumpel TP, Koller J, Wiesenthal V, Weintraub N (2021) Can self-efficacy mediate between knowledge of policy, school support and teacher attitudes towards inclusive education? PLoS ONE 16 (9): e0257657. <https://doi.org/10.1371/journal.pone.0257657> PMID: 34543328

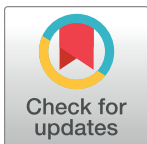

## OPEN ACCESS

**Citation:** Werner S, Gumpel TP, Koller J, Wiesenthal V, Weintraub N (2022) Correction: Can self-efficacy mediate between knowledge of policy, school support and teacher attitudes towards inclusive education? PLoS ONE 17(1): e0262625. <https://doi.org/10.1371/journal.pone.0262625>

**Published:** January 11, 2022

**Copyright:** © 2022 Werner et al. This is an open access article distributed under the terms of the [Creative Commons Attribution License](https://creativecommons.org/licenses/by/4.0/), which permits unrestricted use, distribution, and reproduction in any medium, provided the original author and source are credited.
